# Supplementary material for: Insights into KIF11 pathogenesis in microcephaly-lymphedema-chorioretinopathy syndrome from a lymphatic perspective
Source: JCI journal article supplement (doi:10.1172/jci.insight.177656), 2025-12-18
Supplement: sd2 [file 2]

Full unedited gel for Figure 2C

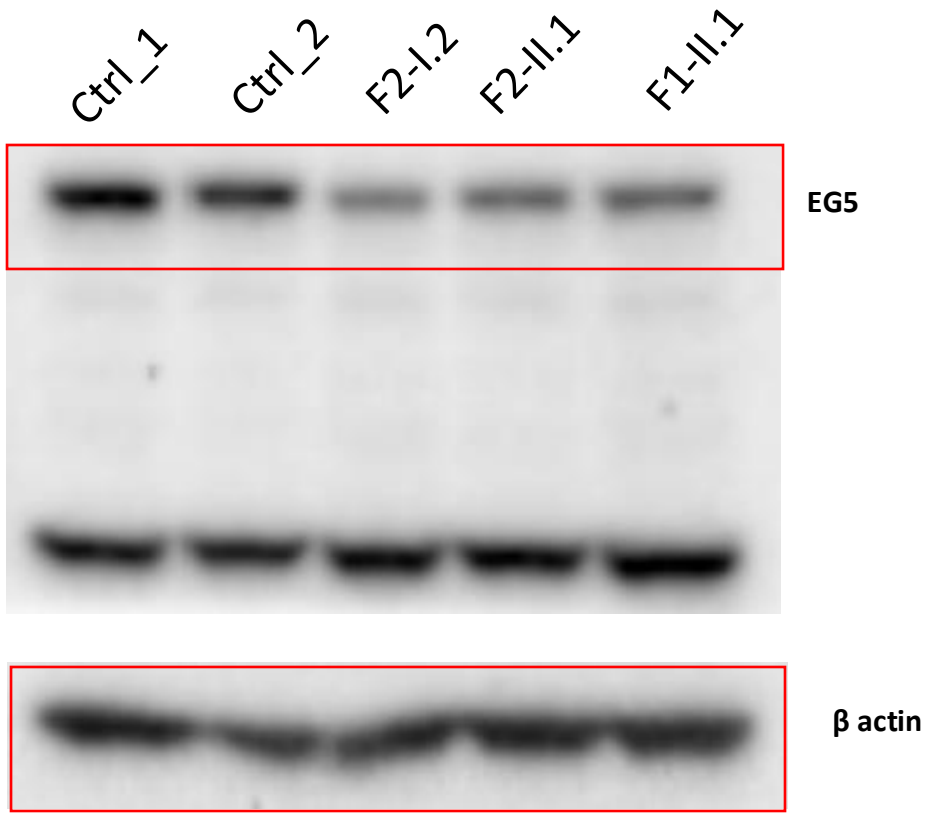

Full unedited gel for Figure 2D

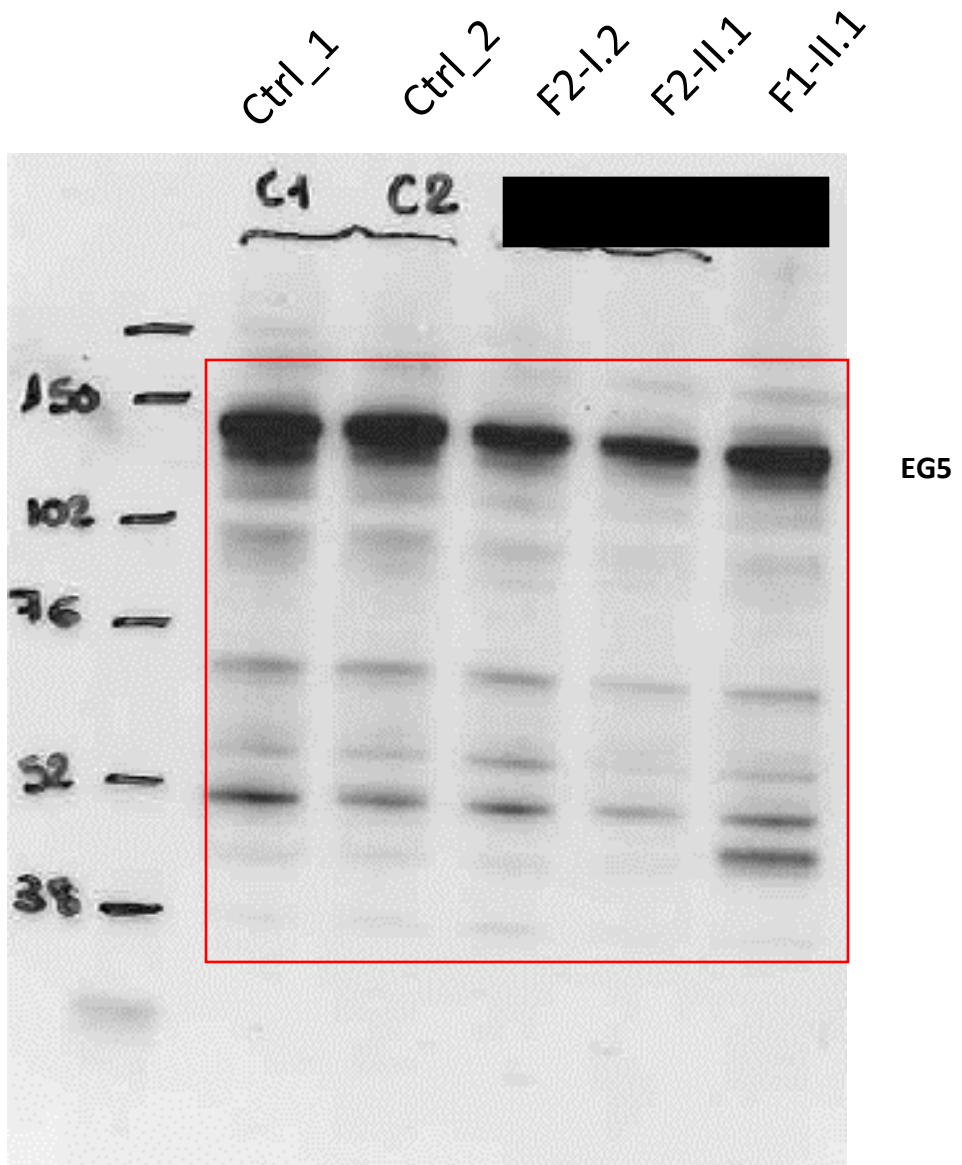

Full unedited gel for Figure 8A

siRNA KIF11

siRNA Ctrl

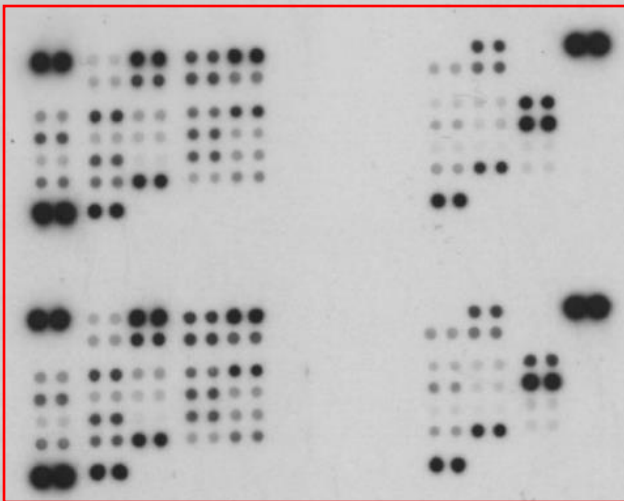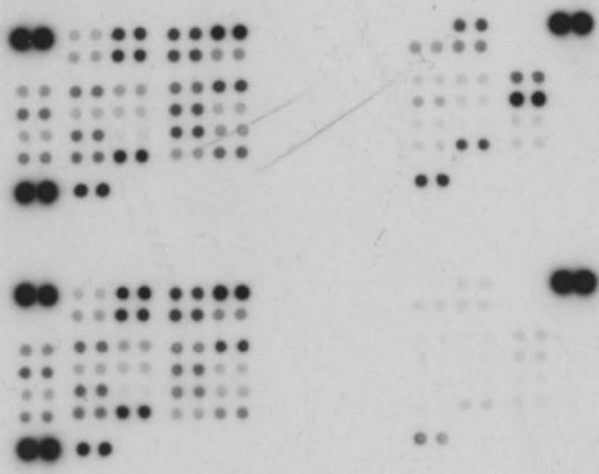

5' 21.3.19

# Full unedited gel for Figure 8C

0 5 10 15 30 45

0 5 10 15 30 45

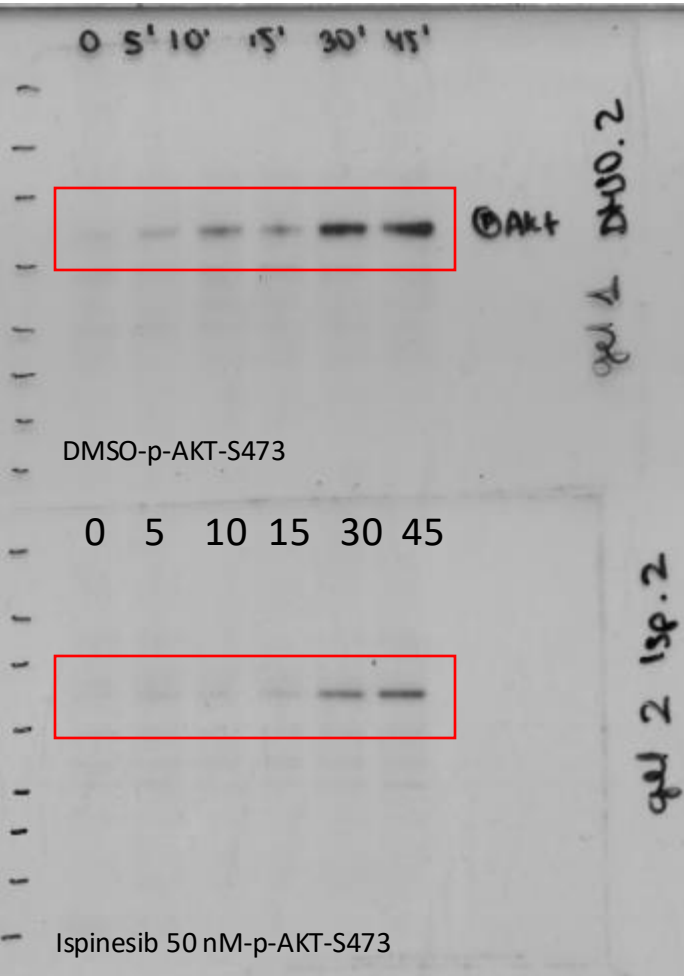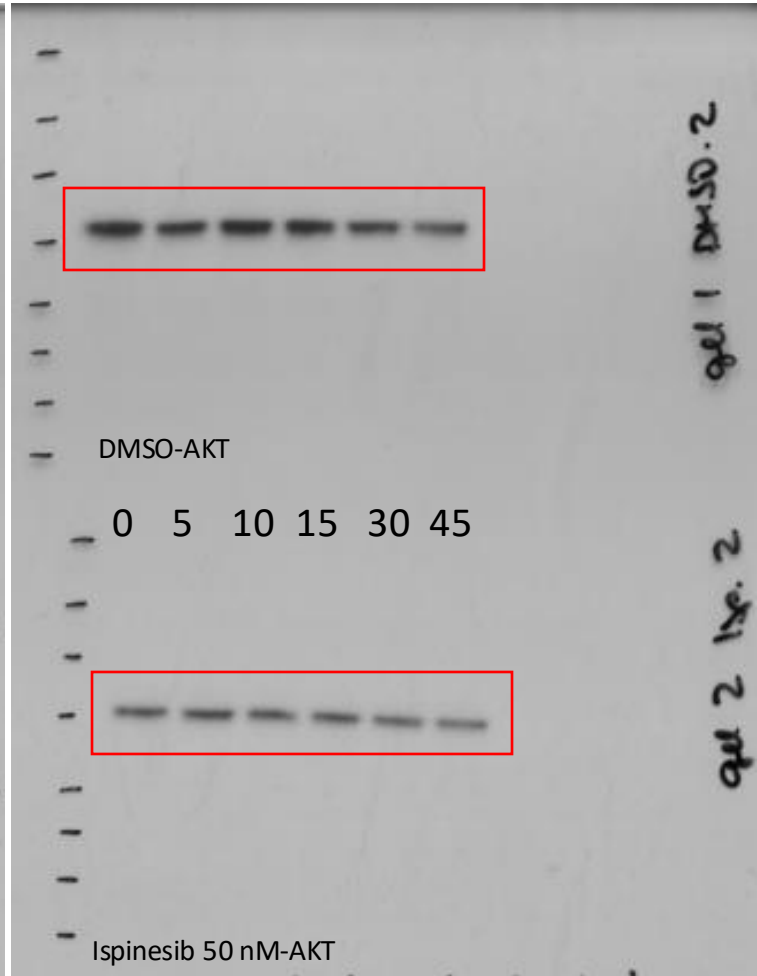

0 5 10 15 30 45

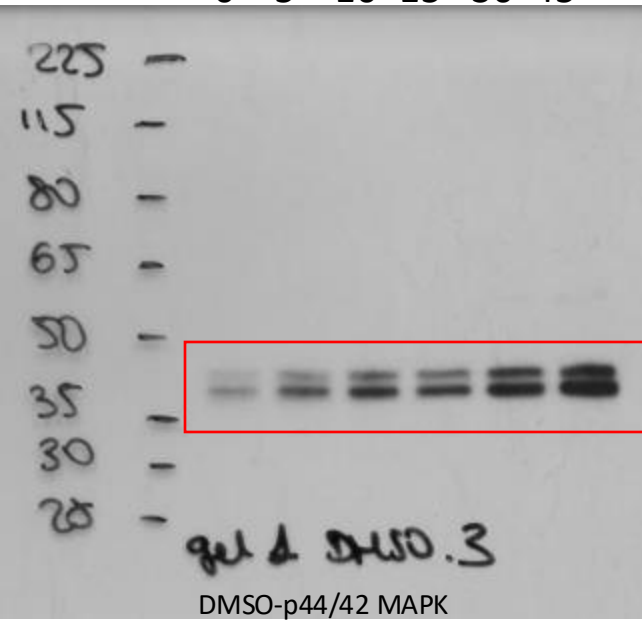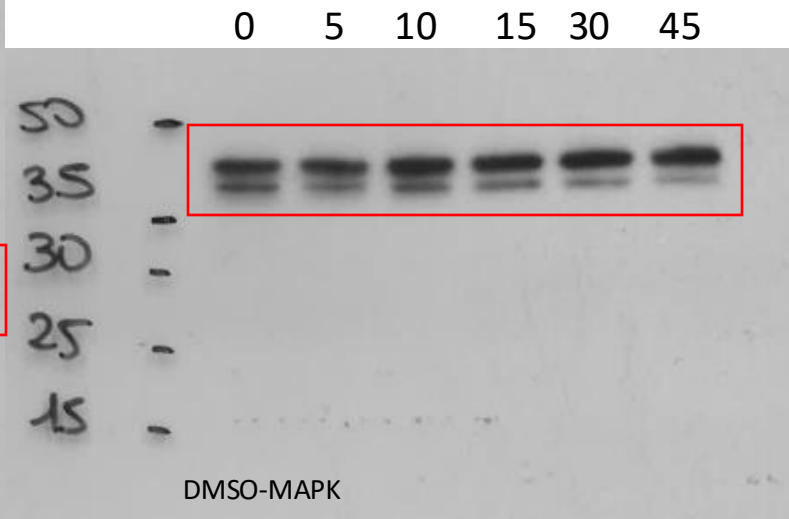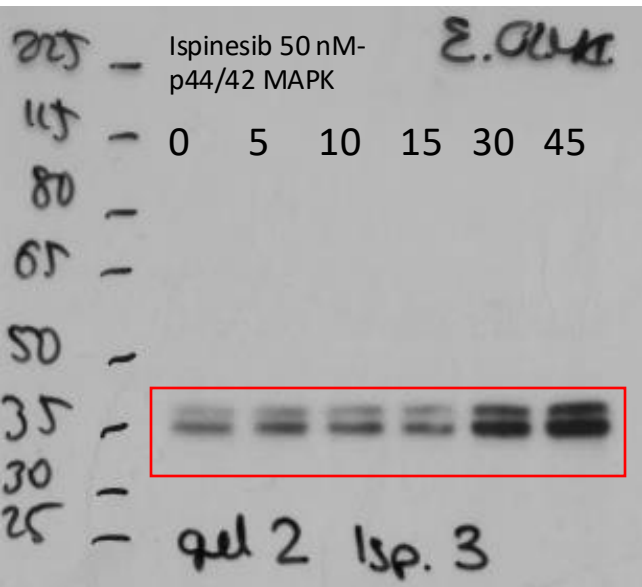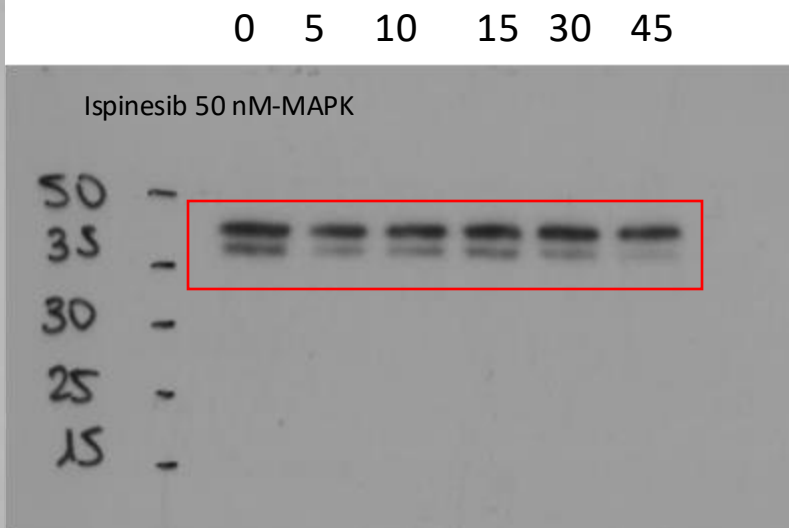

Full unedited gel for Figure 8E

siRNA Ctrl  
siRNA KIF11  
siRNA Ctrl  
siRNA KIF11

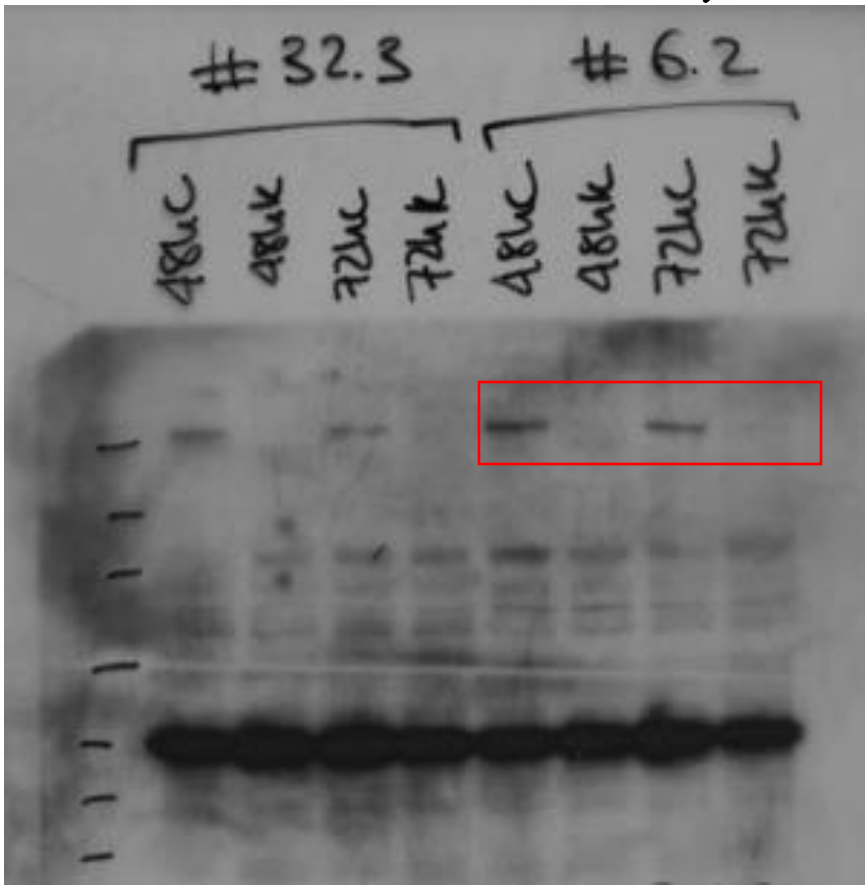

EG5

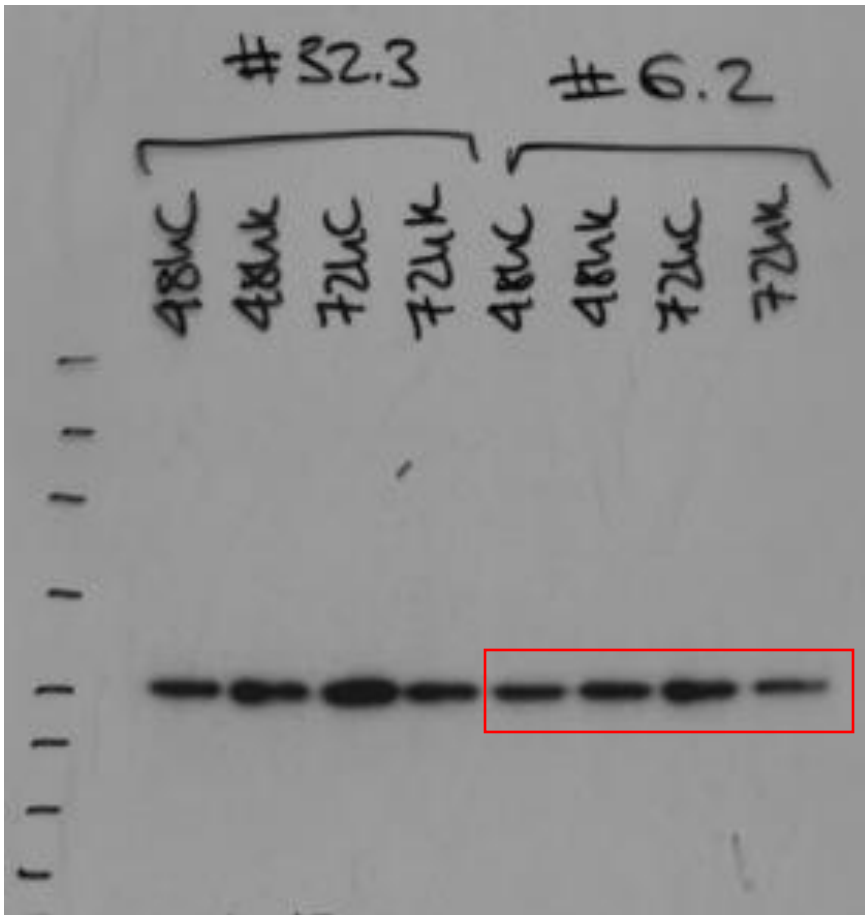

GAPDH

Full unedited gel for Figure 8E

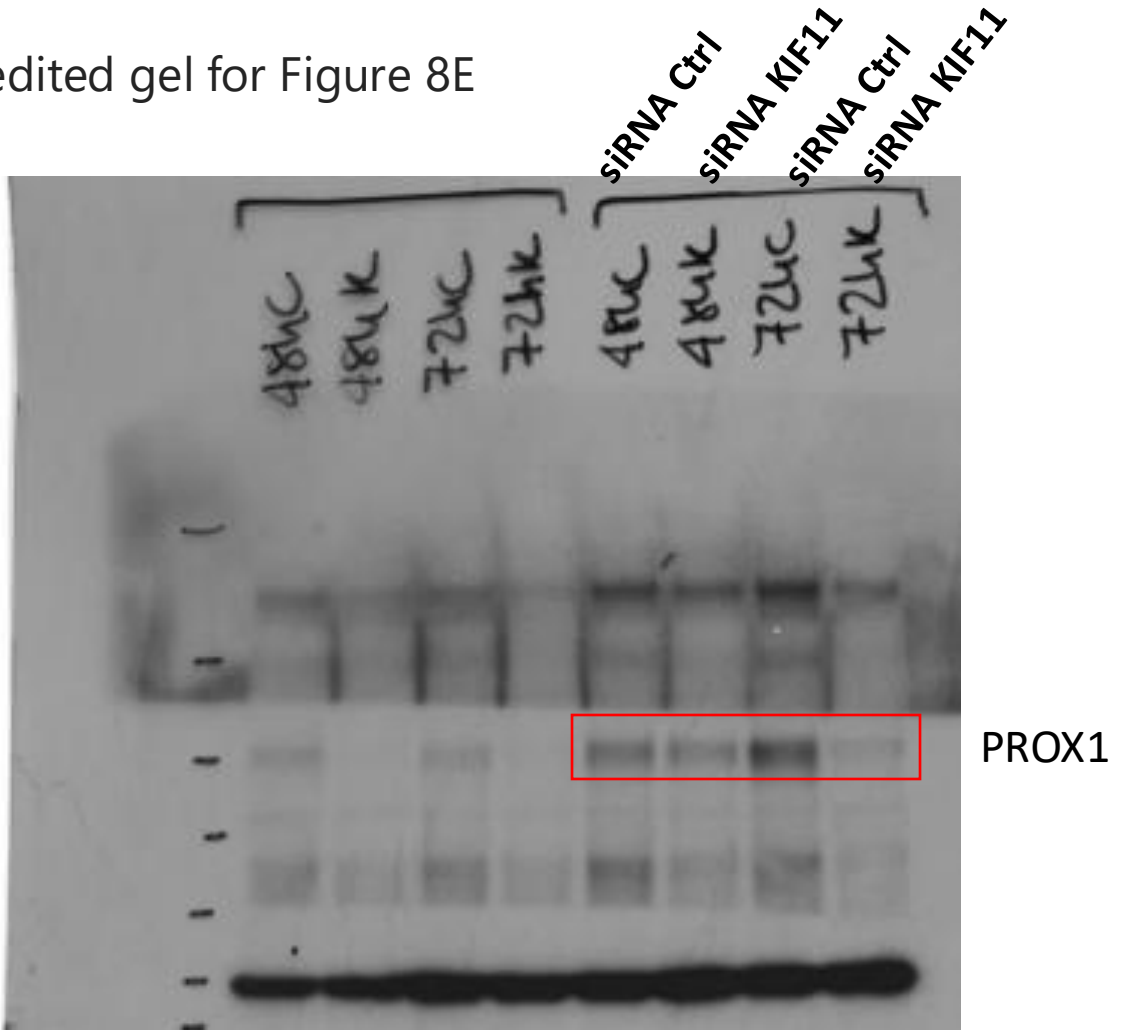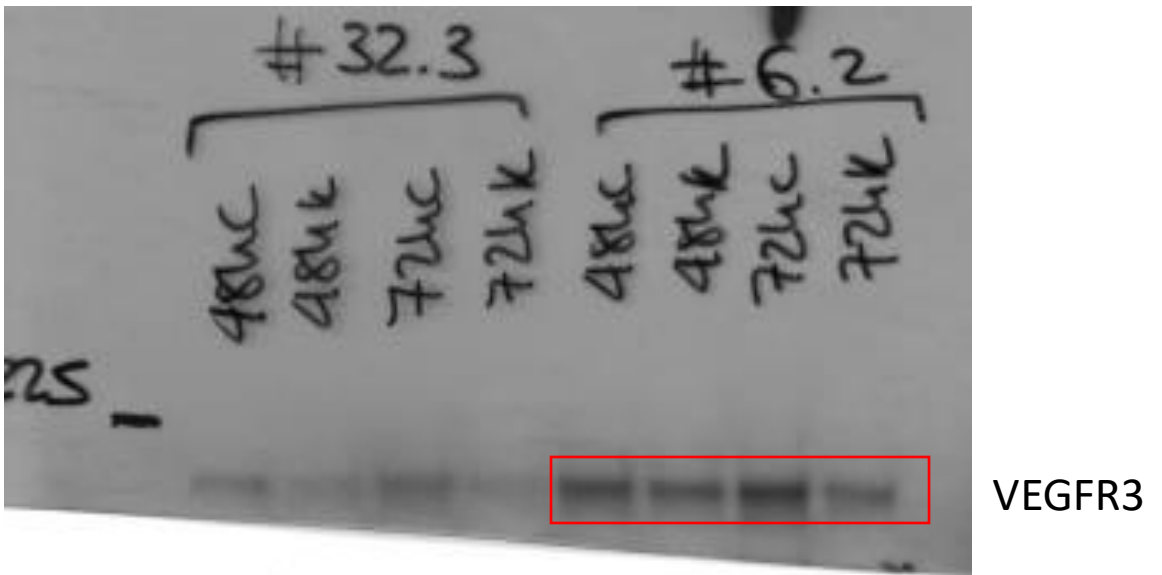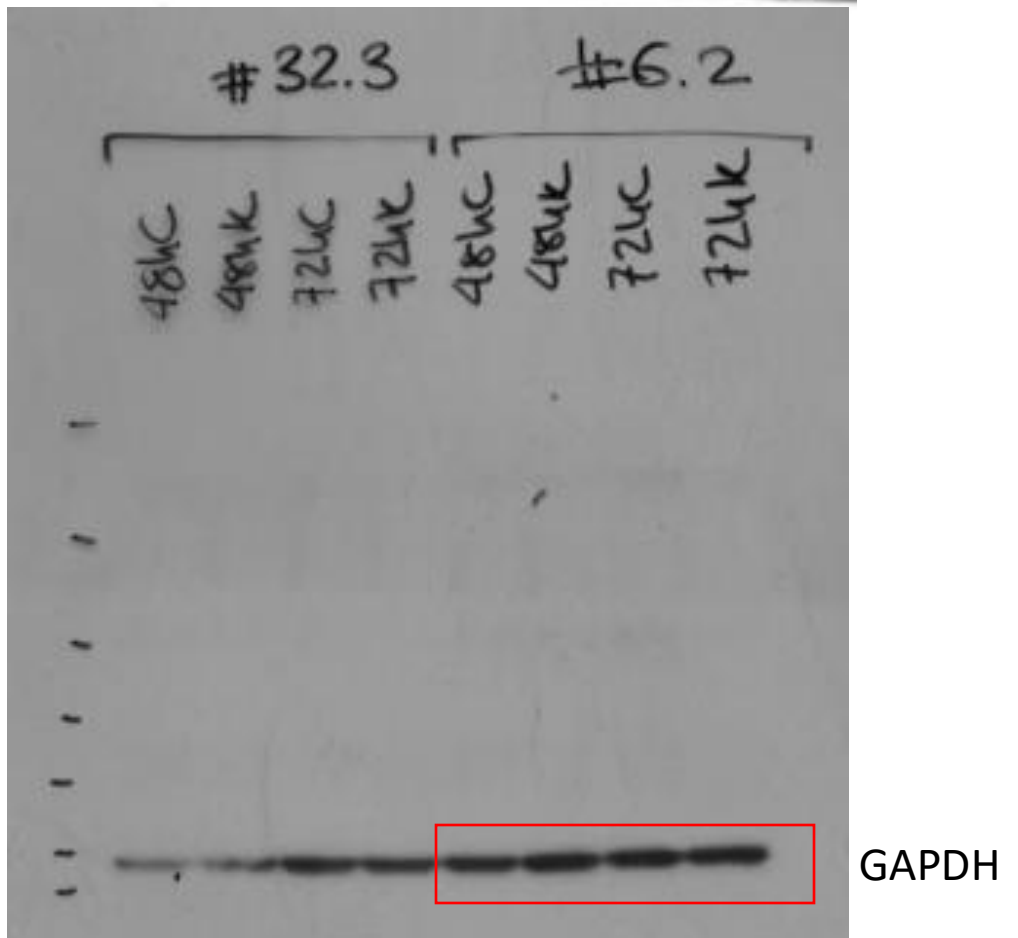

Full unedited gel for Figure S4A

siRNA Ctrl  
siRNA KIF11 #6  
siRNA KIF11 #7

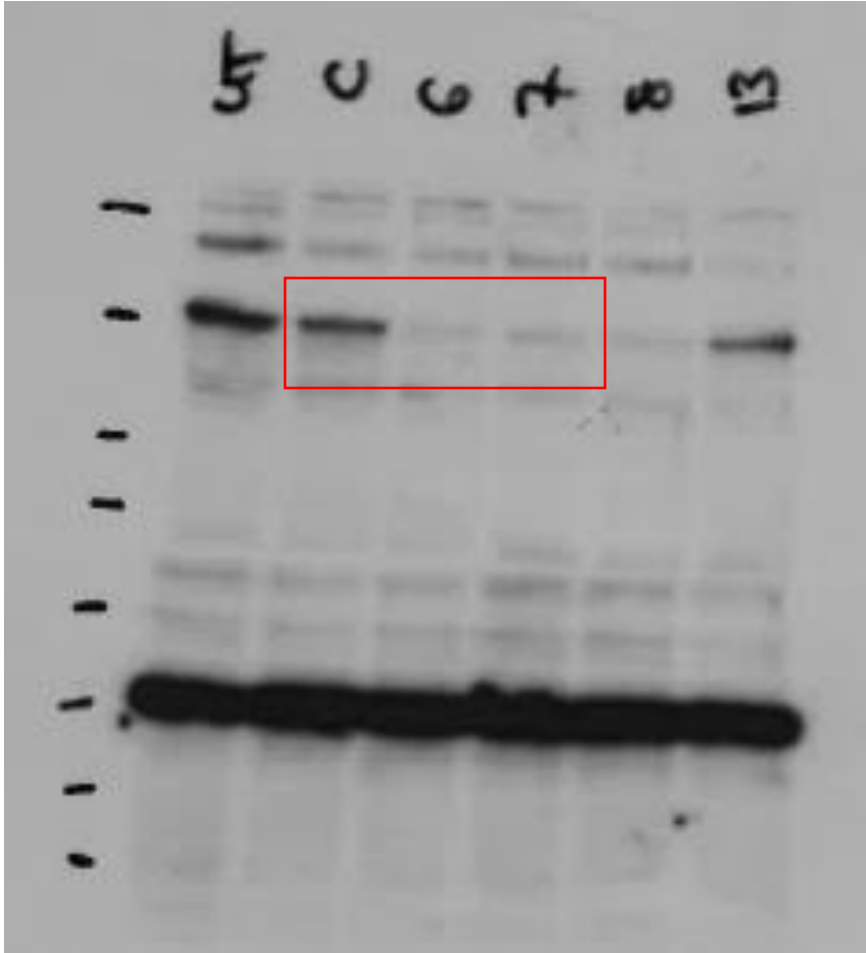

EG5

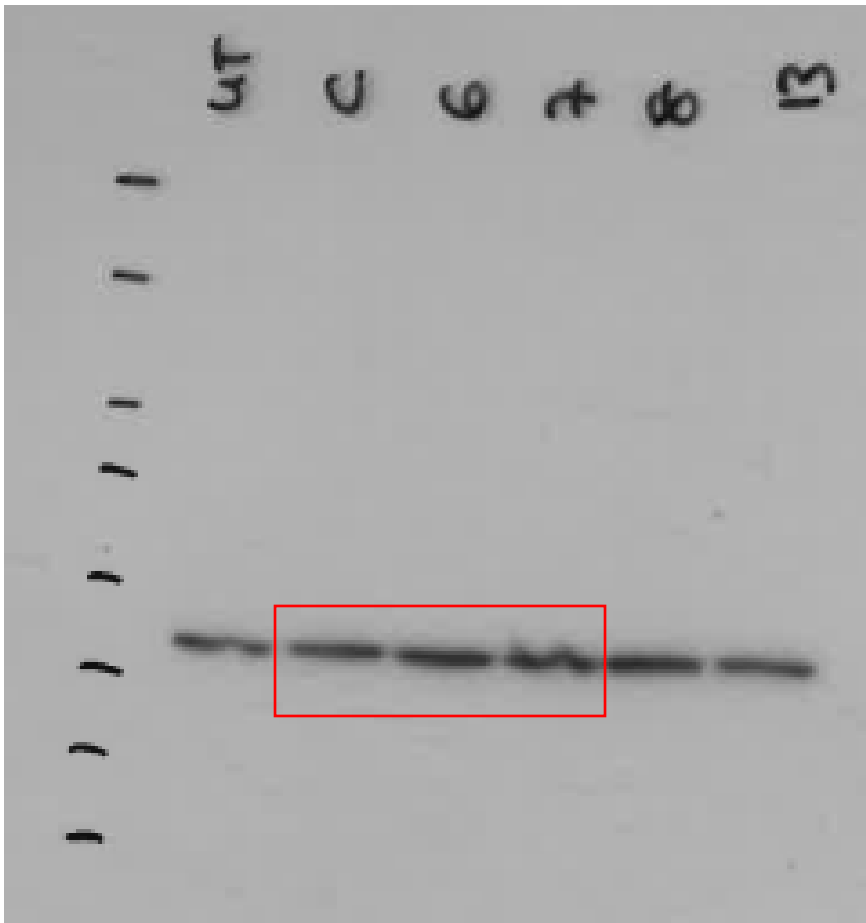

GAPDH
